# Supplementary material for: Staphylococcus argenteus and Staphylococcus schweitzeri are cytotoxic to human cells in vitro due to high expression of alpha-hemolysin Hla
Source: PubMed Central journal article supplement (PMC6550535; doi:10.1080/21505594.2019.1620062), 2019-05-25

1 **Supplemental information**

2

3 **Table S1. Results from MS analyses**

| Gel bands from |                      | Match in RK308 ORF collection |                       |                       |                             |                    |                                                                |
|----------------|----------------------|-------------------------------|-----------------------|-----------------------|-----------------------------|--------------------|----------------------------------------------------------------|
| Fig. 2A        |                      |                               |                       |                       |                             |                    |                                                                |
| #              | Estimated size (kDa) | Contig number                 | number of amino acids | calculated size (kDa) | coverage in MS analysis (%) | number of peptides | Result from BLASTp against <i>Staphylococcus</i> proteins      |
| 1              | 45                   | 8                             | 395                   | 45                    | 41                          | 17                 | Cysteine protease                                              |
| 2              | 35                   | 8                             | 319                   | 36                    | 66                          | 27                 | Beta-channel forming cytolysin                                 |
| 3              | 20                   | 17                            | 189                   | 21                    | 56                          | 11                 | DUF4888 domain-containing protein (domain of unknown function) |

4

5

6 **Figure S1.**

7 **Hla protein sequence analyses.** (A) Alignment of *S. argenteus* RK308 and MSHR1132T,  
8 which are identical (*S. arg*), *S. schweitzeri* FSA084T (*S. schw*) and *S. aureus* 1800T (*S. aur*)  
9 Hla protein sequences. Dot; identical amino acid to *S. argenteus*, bold; a selection of amino  
10 acid residues showed in *S. aureus* to be important for binding to the cell membrane and pore  
11 formation, boxed; cleaved signal peptide. (B) Neighbour-joining phylogenetic tree based on  
12 alignment of Hla amino acid sequences.

13

14

**Figure S1.**

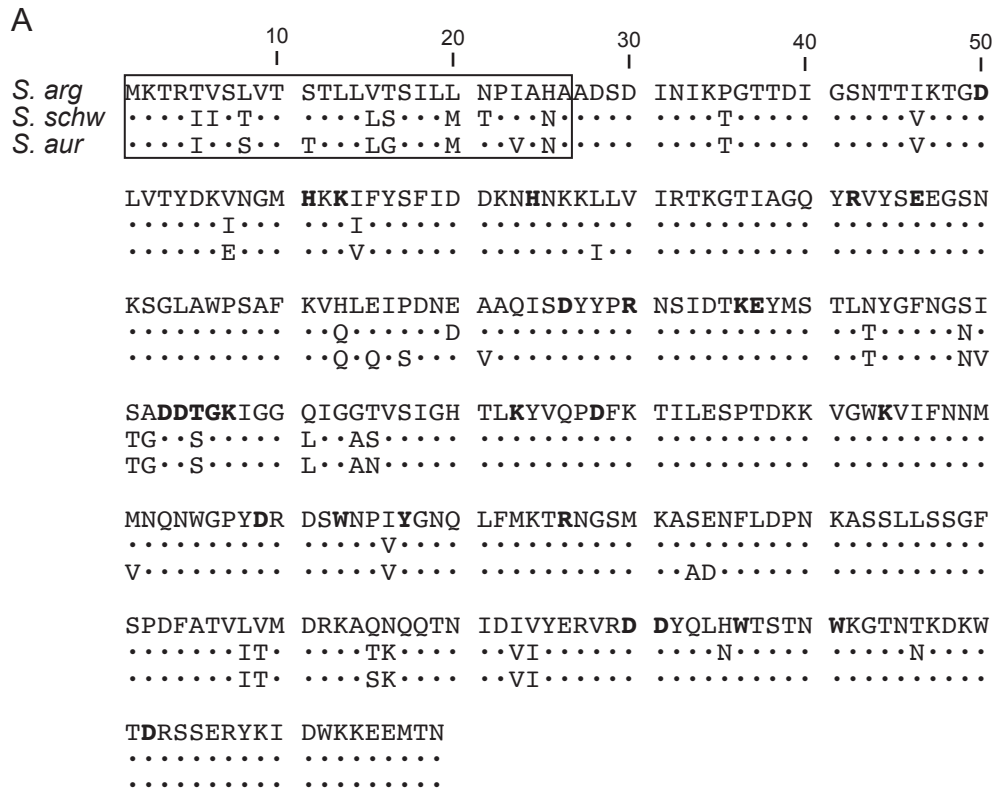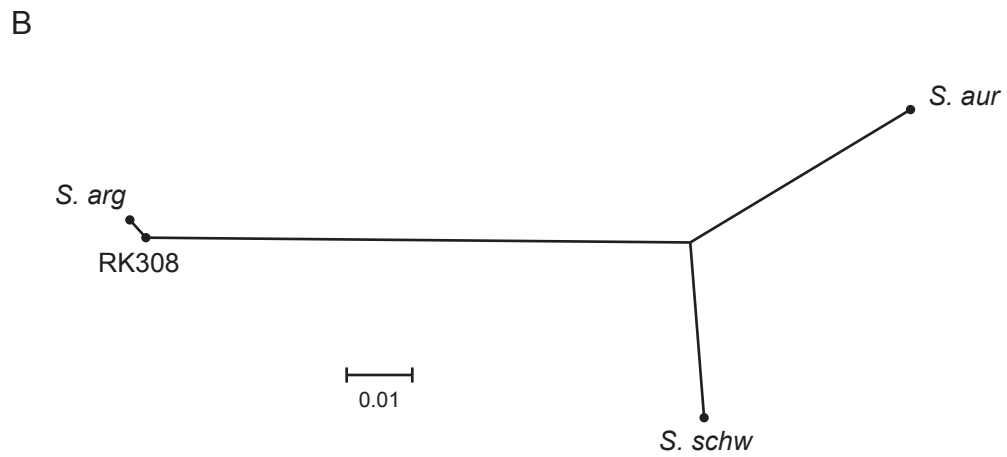

Supplement: kvir-10-01-1620062-s001.pdf [file kvir-10-01-1620062-s001.pdf]
